# Supplementary material
Source: PubMed Central journal article supplement (PMC4313144)
Supplement: JCM.01258-14_zjm999093670so1.pdf [file JCM.01258-14_zjm999093670so1.pdf]

**Supplementary Table 1. Comparison of predictor models to estimate QuIC metrics.** Models represent linear regressions of all individual predictors, and are ranked from most parsimonious to least parsimonious by  $\Delta AICc$ . AIC=Akaike Information Criterion, K=number of model parameters,  $w$ =model weight,  $r^2$ =coefficient of variation.

| Predictor     | K | AICc    | $\Delta AICc$ | $w$   | $r^2$ | Predictor     | K | AICc    | $\Delta AICc$ | $w$   | $r^2$ |
|---------------|---|---------|---------------|-------|-------|---------------|---|---------|---------------|-------|-------|
| ThT score     |   |         |               |       |       | ThS score     |   |         |               |       |       |
| Species       | 1 | -13.746 | 0.000         | 0.272 | 0.035 | Sex           | 1 | -13.793 | 0.000         | 0.551 | 0.148 |
| Age           | 1 | -13.474 | 0.272         | 0.237 | 0.023 | aa96          | 1 | -11.649 | 2.144         | 0.189 | 0.060 |
| aa96          | 1 | -13.259 | 0.487         | 0.213 | 0.014 | Age           | 1 | -10.599 | 3.194         | 0.112 | 0.014 |
| Sex           | 1 | -12.985 | 0.761         | 0.186 | 0.001 | Species       | 1 | -10.378 | 3.415         | 0.100 | 0.004 |
| State         | 1 | -11.595 | 2.151         | 0.093 | 0.029 | State         | 1 | -8.924  | 4.869         | 0.048 | 0.029 |
| ThT amplitude |   |         |               |       |       | ThS amplitude |   |         |               |       |       |
| Sex           | 1 | 389.446 | 0.000         | 0.349 | 0.062 | Age           | 1 | 350.197 | 0.000         | 0.691 | 0.221 |
| aa96          | 1 | 390.379 | 0.933         | 0.219 | 0.022 | State         | 1 | 353.867 | 3.670         | 0.110 | 0.159 |
| Species       | 1 | 390.674 | 1.227         | 0.189 | 0.009 | Sex           | 1 | 354.152 | 3.955         | 0.096 | 0.067 |
| Age           | 1 | 390.811 | 1.365         | 0.176 | 0.002 | aa96          | 1 | 355.156 | 4.959         | 0.058 | 0.024 |
| State         | 1 | 392.746 | 3.300         | 0.067 | 0.005 | Species       | 1 | 355.660 | 5.463         | 0.045 | 0.001 |
| ThT slope     |   |         |               |       |       | ThS slope     |   |         |               |       |       |
| Age           | 1 | 45.003  | 0.000         | 0.504 | 0.194 | aa96          | 1 | -33.086 | 0.000         | 0.888 | 0.307 |
| Species       | 1 | 47.308  | 2.305         | 0.159 | 0.105 | Age           | 1 | -27.483 | 5.603         | 0.054 | 0.107 |
| Sex           | 1 | 47.387  | 2.384         | 0.153 | 0.102 | State         | 1 | -25.627 | 7.459         | 0.021 | 0.112 |
| State         | 1 | 47.955  | 2.952         | 0.115 | 0.158 | Sex           | 1 | -25.489 | 7.597         | 0.020 | 0.022 |
| aa96          | 1 | 48.993  | 3.990         | 0.069 | 0.034 | Species       | 1 | -25.141 | 7.945         | 0.017 | 0.006 |
